# Supplementary material
Source: publisher site journal article supplement (https://www.dovepress.com/get_supplementary_file.php?f=253631-2.xlsx)
Supplement: Supplementary file 1 [file get_supplementary_file.php]

## Sheet: Sheet1
Name	性别	Year range	科室	Disease	Source	Collect date	Amoxicillin	Amikacin	Ampicillin	Ampicillin/sulbactam	Aztreonam	Cefazolin	Cefepime	Cefoperazone/sulbactam	Cefotaxime	Ceftazidime	Cefuroxime	Chloramphenicol	Ciprofloxacin	Gentamicin	Imipenem	Levofloxacin	Meropenem	Piperacillin	Piperacillin/tazobactam	Tetracycline	Trimethoprim/sulfamethoxazole	Colistin	Polymyxin B	Tigecycline	Fosfomycin	Florfenicol	Streptomycin	Neomycin
P1	男	71-80	重症医学科	Pulmonary infection	Seroperitoneum	Sep 2015	R	R	R	R	R	R	R	R	R	R	R	I	R	R	R	R	R	R	R	R	R	S	S	S	R	I	S	S
P2	男	91-100	重症医学科	Pulmonary infection	Whole blood	Sep 2015	R	R	R	R	R	R	R	R	R	R	R	S	R	R	R	R	R	R	R	R	R	S	S	S	R	S	S	R
P3	男	91-100	重症医学科	Pulmonary infection	Sputum	Sep 2015	R	R	R	R	R	R	R	R	R	R	R	R	R	R	R	R	R	R	R	R	R	S	S	S	R	S	S	R
P7	男	91-100	重症医学科	Pulmonary infection	Sputum	Aug 2015	R	R	R	R	R	R	R	R	R	R	R	R	R	R	R	R	R	R	R	R	R	S	S	S	R	I	S	R
P8	男	71-80	呼吸内科	Pulmonary infection	Sputum	May 2015	R	R	R	R	R	R	R	R	R	R	R	I	R	R	R	R	R	R	R	R	R	S	S	S	R	I	S	R
P10	男	71-80	胃肠外科一区	Respiratory failure	Midstream urine	Jun 2018	R	S	R	R	R	R	R	R	R	R	R	S	S	S	R	S	R	R	R	R	R	S	S	S	R	I	S	S
P12	男	41-50	神经外科	Pulmonary infection	Sputum	Jul 2014	R	S	R	R	S	R	R	R	R	R	R	S	S	S	R	S	R	R	R	S	S	S	S	S	R	I	S	S
P21	男	51-60	重症医学科	Pulmonary infection	Urine	Jun 2013	R	S	R	R	R	R	R	R	R	R	R	R	R	R	R	R	R	R	R	R	R	S	S	S	R	I	R	S
P22	男	51-60	神经外科	Urinary infection	midstream urine	Jun 2013	R	S	R	R	R	R	R	R	R	R	R	R	R	R	R	I	R	R	R	R	R	S	S	S	R	R	R	S
P23	男	31-40	普外一区	Hemorrhagic shock, intra-abdominal infection, septic shock	Wound secretion	Jul 2013	R	S	R	R	R	R	R	R	R	R	R	R	R	R	R	I	R	R	R	R	R	S	S	S	R	R	R	S
P24	男	31-40	重症医学科	Aspiration pneumonia, abdominal infection	Ascitic fluid	Jun 2013	R	S	R	R	R	R	R	R	R	R	R	R	R	R	R	I	R	R	R	R	R	S	S	S	R	I	S	S
P28	女	51-60	血液风湿科	Pulmonary invasive fungal disease, pulmonary infection	Sputum	Oct 2013	R	R	R	R	R	R	R	R	R	R	R	R	R	R	R	I	R	R	R	S	R	S	S	S	R	R	R	R
P31	男	unknown	烧伤整形区	Scar contracture deformity of the right hand	Wound secretion	Dec 2013	R	R	R	R	R	R	R	R	R	R	R	R	R	R	R	I	R	R	R	R	R	S	S	S	R	R	R	S
P35	男	71-80	重症医学科	septic shock, bloodstream infection	Whole blood	Jul 2013	R	S	R	R	R	R	R	R	R	R	R	R	R	S	R	R	R	R	R	S	R	S	S	S	R	R	R	S
P36	男	81-90	重症医学科	Pulmonary infection	Sputum	Jul 2013	R	R	R	R	R	R	R	R	R	R	R	R	R	R	R	R	R	R	R	R	S	S	S	S	R	R	R	S
P37	男	41-50	普外一区	Abdominal wound infection	Wound secretion	Jul 2013	R	S	R	R	S	R	R	R	R	R	R	R	R	R	R	S	I	R	R	R	R	S	S	S	R	R	R	S
P38	男	51-60	烧伤整形区	Bloodstream infection	Wound secretion	Jul 2013	R	S	R	R	R	R	R	R	R	R	R	R	R	S	R	I	R	R	R	R	R	S	S	S	R	R	R	S
P41	男	0-10	小儿科	Bronchopneumonia	Sputum	Dec 2016	R	R	R	R	I	R	R	R	R	R	R	S	S	R	R	S	R	R	R	S	R	S	S	S	R	R	S	S
P42	男	51-60	烧伤整形区	Chronic skin ulcers in the lower abdomen, fascioliasis	pyogenic fluid	Nov 2013	R	S	R	R	R	R	R	R	R	R	R	R	R	R	R	S	R	R	R	R	R	S	S	S	R	R	R	S
